# Supplementary material for: Influence of the supramolecular architecture on the magnetic properties of a DyIII single-molecule magnet: an ab initio investigation
Source: publisher site journal article supplement (doi:10.3762/bjnano.5.236), 2014-11-27
Supplement: Additional file 1 [file 2190-4286-5-236-S1.pdf]

## **Supporting Information**

for

### **Influence of the supramolecular architecture on the magnetic properties of a Dy<sup>III</sup> single-molecule magnet: an ab initio investigation**

Julie Jung<sup>1</sup>, Olivier Cador<sup>1</sup>, Kevin Bernot<sup>2</sup>, Fabrice Pointillart<sup>1</sup>, Javier Luzon<sup>3,4</sup> and Boris Le Guennic<sup>\*1</sup>

Address: <sup>1</sup>Institut des Sciences Chimiques de Rennes, UMR 6226 CNRS - Université de Rennes 1, 263 Avenue du Général Leclerc, 35042 Rennes Cedex, France; <sup>2</sup>INSA, ISCR, UMR 6226, Université Européenne de Bretagne, 35708 Rennes, France; <sup>3</sup>Instituto de Ciencia de Materiales de Aragon, CSIC–Universidad de Zaragoza, Pedro Cerbuna 12, 50009 Zaragoza, Spain and <sup>4</sup>Centro Universitario de la Defensa, Academia General Militar, Zaragoza, Spain

Email: Boris Le Guennic\* - boris.leguennic@univ-rennes1.fr

\* Corresponding author

**Additional experimental data**

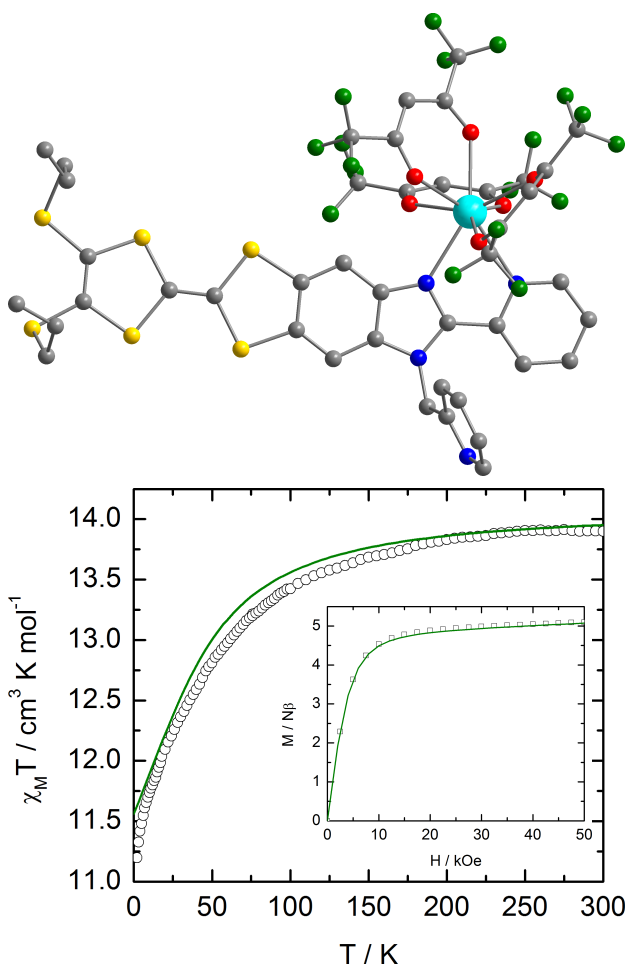

**Figure S1:** Molecular structure of **Dy2** (top). Dy, O, N, C, S and F atoms are depicted in light blue, red, blue, grey, yellow and green, respectively. H atoms are omitted for clarity. Thermal variation of  $\chi_M T$  of a solid-state sample of **Dy2** (black circles) with the curve (in green) computed on the basis of SA-CASSCF/RASSI-SO calculations (bottom). Inset: field variation of the magnetization at 2 K (black squares) with the computed curve (in green) obtained at the same level of calculation.

### Susceptibility tensor in the crystal frame (XYZ) for Dy1.

The susceptibility tensor in the crystal reference frame is then equal to:

$$\chi_M T = \begin{pmatrix} 10.136 & -2.222 & 7.313 \\ -2.222 & 5.763 & 2.545 \\ 7.313 & 2.545 & 12.888 \end{pmatrix} \text{cm}^3 \cdot \text{K} \cdot \text{mol}^{-1}$$

Principal values and direction of the susceptibility tensor in the XYZ crystal frame are extracted in diagonalizing the previous matrix:

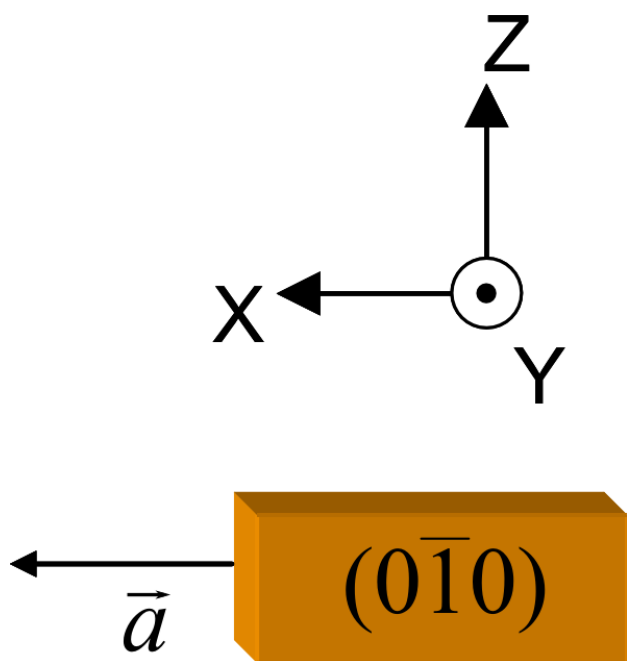

**Figure S2:** Oriented single-crystal of **Dy1** with the XYZ crystal reference frame.

$$\chi_{xx}T \begin{pmatrix} 0.499 \\ -0.787 \\ -0.262 \end{pmatrix} = 8.340, \chi_{yy}T \begin{pmatrix} -0.594 \\ -0.615 \\ 0.518 \end{pmatrix} = 1.470, \chi_{zz}T \begin{pmatrix} 0.630 \\ 0.043 \\ 0.775 \end{pmatrix} = 18.98 \text{ cm}^3 \cdot \text{K} \cdot \text{mol}^{-1}$$

In the effective spin 1/2 approximation the principal  $g$  values are equal to:  $g_z = 14.22$ ,  $g_y = 3.96$  and  $g_x = 9.43$ .

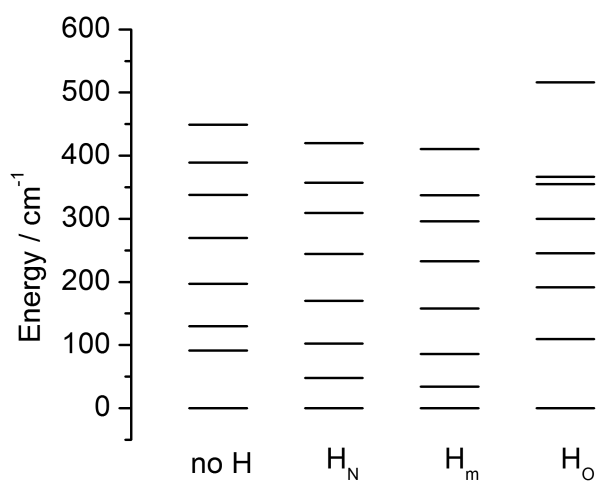

**Figure S3:** Splitting of the  ${}^6H_{15/2}$  manifold of **Dy1** evaluated from ab initio calculations.

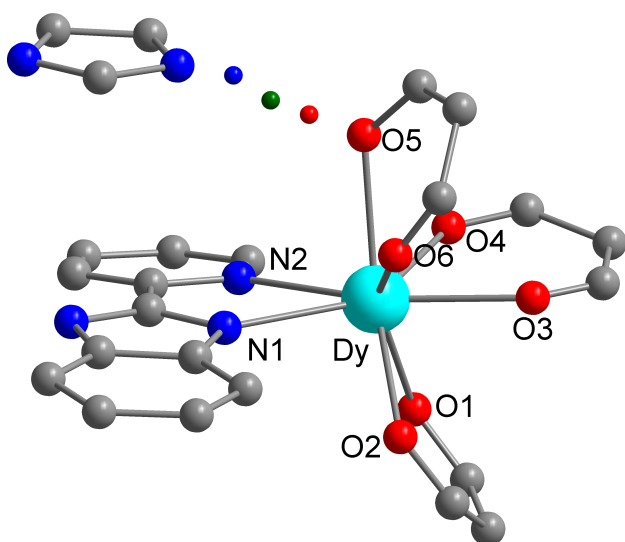

**Figure S4:** Labels of the atoms in the first coordination sphere of Dy in **Dy1**.

**Table S1:** Distances between the Dy center and atoms  $X^i$  of the first coordination sphere (in Å) for **Dy1**. Labels are given in Figure S4. Calculated charge ( $q$ , in  $e^-$ ) and electrostatic potential ( $V_E = q/r$ ) for different positions of the hydrogen atom involved in the hydrogen bond.  $V_E < 0$  ( $V_E > 0$ ) corresponds to an attractive (repulsive) potential.

| $X^i$ | Dy- $X^i$ | no H  |       | $H_N$ |       | $H_O$ |       | $H_m$ |       |
|-------|-----------|-------|-------|-------|-------|-------|-------|-------|-------|
|       |           | $q$   | $V_E$ | $q$   | $V_E$ | $q$   | $V_E$ | $q$   | $V_E$ |
| Dy    | —         | 2.53  | —     | 2.53  | —     | 2.52  | —     | 2.53  | —     |
| O1    | 2.327     | -0.73 | -0.32 | -0.74 | -0.32 | -0.74 | -0.32 | -0.74 | -0.32 |
| O2    | 2.319     | -0.65 | -0.28 | -0.65 | -0.28 | -0.66 | -0.28 | -0.65 | -0.28 |
| O3    | 2.314     | -0.63 | -0.27 | -0.66 | -0.28 | -0.67 | -0.29 | -0.66 | -0.29 |
| O4    | 2.349     | -0.64 | -0.27 | -0.66 | -0.28 | -0.66 | -0.28 | -0.66 | -0.28 |
| O5    | 2.388     | -0.73 | -0.31 | -0.76 | -0.32 | -0.55 | -0.23 | -0.71 | -0.30 |
| O6    | 2.378     | -0.58 | -0.25 | -0.57 | -0.24 | -0.50 | -0.21 | -0.54 | -0.23 |
| N1    | 2.451     | -0.45 | -0.18 | -0.46 | -0.19 | -0.49 | -0.20 | -0.47 | -0.19 |
| N2    | 2.538     | -0.35 | -0.14 | -0.36 | -0.14 | -0.39 | -0.15 | -0.37 | -0.15 |
